# Supplementary material for: Exploring the use and perceptions of community parks with engagement activities: a case study of Tokyo, Japan
Source: Frontiers journal article supplement (doi:10.3389/frsc.2025.1599193), 2025-07-02
Supplement: Supplementary_file_1.docx [file Supplementary_file_1.docx]

**Appendix 1. Survey data and the main amenities of the selected parks**

|  | Zoshigaya Park | Kami-Ikebukuro Kusunoki Park | Nishi-Sugamo 2-Chome Park |
| --- | --- | --- | --- |
| Location | Zoshigaya 2-Chome | Kami-Ikebukuro 4-Chome | Nishi-Sugamo 2-Chome |
| Nearest Station | Toden Kishimojinmae Station | Tobu Tojo Line Kita-Ikebukuro Station | Toden Nakasugamo Station |
| Distance from Station (m) | 500 | 450 | 500 |
| Park Size (m2) | 8653.75 | 3088.8 | 1357.83 |
| Benches | 20 | 9 | 3 |
| Portable Chairs | 3 | 0 | 0 |
| Stools | 7 | 5 | 5 |
| Multi-functional room | yes | no | yes |
| Playground Equipment | 5 | 3 | 2 |
| Tennis Facilities | yes | no | no |
| Walking Course | yes | yes | no |
| Fitness Equipment | 2 | 1 | 0 |
| Open Space | yes | yes | yes |
| Children's Play Area | yes | no | no |
| Lawn Area | yes | yes | no |
| Tall Trees | 15 | 1 | 11 |
| Low Trees | 51 | 16 | 13 |
| Fixed Flower Beds | 2 | 2 | 4 |
| Movable Flower Beds | 7 | 7 | 10 |
| Public Toilet | yes | yes | yes |
| Drinking Fountain | 3 | 3 | 1 |

**Appendix 2. Binary Logistic Regression Analysis of Factors Influencing Park Usage Frequency**

| Variable | Coefficient (β) | Std. Error | Wald | | df | | Sig. | 95% CI for Odds Ratio | |
| --- | --- | --- | --- | --- | --- | --- | --- | --- | --- |
| Lower | Upper |
| **Park** (Ref=Zoshigaya Park) |  |  | 22.05 | | 2 | | <.001 |  |  |
| Nishi-Sugamo 2-Chome Park | -2.09*** | 0.547 | 14.596 | | 1 | | <.001 | 0.124 | 0.042 |
| Kami-Ikebukuro Kusunoki Park | -2.217*** | 0.555 | 15.952 | | 1 | | <.001 | 0.109 | 0.037 |
| **Event Participation** (Ref=No) | 2.089*** | 0.479 | 19.035 | | 1 | | <.001 | 8.078 | 3.16 |
| **Occupation** (Ref=Full-time) |  |  | 10.109 | | 2 | | 0.006 |  |  |
| Part-time Employment | -1.002 | 0.633 | 2.503 | | 1 | | 0.114 | 0.367 | 0.106 |
| Unemployed | 1.079* | 0.474 | 5.18 | | 1 | | 0.023 | 2.942 | 1.162 |
| **Perceived Safety** | 0.759** | 0.273 | 7.718 | | 1 | | 0.005 | 2.137 | 1.251 |
| **Gender** (Ref=Male) | -0.927* | 0.442 | 4.394 | | 1 | | 0.036 | 0.396 | 0.166 |
| **Years of Residence** (Ref: 0-5 years) |  |  | 11.461 | | 2 | | 0.003 |  |  |
| 6-10 years | 1.95** | 0.686 | 8.083 | | 1 | | 0.004 | 7.029 | 1.833 |
| Over 10 years | 1.474** | 0.494 | 8.885 | | 1 | | 0.003 | 4.367 | 1.657 |
| Constant | -3.977** | 1.363 | 8.513 | | 1 | | 0.004 | 0.019 |  |
| **Goodness of Fit and Model Performance Statistics** | | |  | |  | |  |  |  |
| Number of Observations | 176 |  |  | |  | |  |  |  |
| -2 Log Likelihood | 159.378 |  |  |  |  |  | |  | |
| Likelihood Ratio (LR) Chi square | 236.948** |  |  |  |  |  | |  | |
| Classification accuracy of fitted model | 79.0% |  |  |  |  |  | |  | |
| Nagelkerke (Pseudo) R2 | 0.489 |  |  |  |  |  | |  | |

*Significance levels: *p < 0.05; **p < 0.01; ***p < 0.001*

**Appendix 3. Results of Ordered Logistic Regression Analysis for Place Attachment Determinants**

| Variable | Coefficient (β) | Std. Error | Wald | | df | | Sig. | 95% CI for Odds Ratio | |
| --- | --- | --- | --- | --- | --- | --- | --- | --- | --- |
| Lower | Upper |
| Threshold 1 (Place Attachment = High) | 8.884*** | 2.034 | 19.083 | | 1 | | <.001 | 4.898 | 12.87 |
| Threshold 2 (Place Attachment =Middle) | 12.141*** | 2.322 | 27.331 | | 1 | | <.001 | 7.589 | 16.693 |
| **Location Variables** |  |  |  | |  | |  |  |  |
| Playground Equipment | 1.000*** | 0.267 | 14.082 | | 1 | | <.001 | 0.478 | 1.523 |
| Space | 1.057*** | 0.271 | 15.191 | | 1 | | <.001 | 0.525 | 1.589 |
| Toilet | -0.901** | 0.333 | 7.316 | | 1 | | 0.007 | -1.554 | -0.248 |
| Barrier-free Access | 0.524* | 0.225 | 5.411 | | 1 | | 0.02 | 0.082 | 0.966 |
| Water Fountain | 0.918* | 0.375 | 5.983 | | 1 | | 0.014 | 0.182 | 1.653 |
| Quiet and Calm | 0.883*** | 0.276 | 10.222 | | 1 | | 0.001 | 0.342 | 1.424 |
| **Participation Variables** |  |  |  | |  | |  |  |  |
| No (ref=Yes) | -1.236* | 0.56 | 4.872 | | 1 | | 0.027 | -2.334 | -0.139 |
| Yes | 0a | . | . | | . | | . | . | . |
| Usage Frequency Variables |  |  |  | |  | |  |  |  |
| High Frequency (ref= Low) | 1.958*** | 0.609 | 10.333 | | 1 | | 0.001 | 0.764 | 3.152 |
| Low Frequency | 0a | . | . | | . | | . | . | . |
| **Goodness of Fit and Model Performance Statistics** | | |  | |  | |  |  |  |
| Number of Observations | 119 |  |  | |  | |  |  |  |
| -2 Log Likelihood | 110.313 |  |  |  |  |  | |  | |
| Likelihood Ratio (LR) Chi square | 162.708*** |  |  |  |  |  | |  | |
| Nagelkerke (Pseudo) R2 | 0.632 |  |  |  |  |  | |  | |
| Parallel Lines Test | p= .998 |  |  |  |  |  | |  | |
